# Supplementary material for: A practical guide to machine-learning scoring for structure-based virtual screening
Source: Springer Nature journal article supplement (doi:10.1038/s41596-023-00885-w), 2023-10-16
Supplement: MOESM1 [file 41596_2023_885_MOESM1_ESM14.pdf]

# A practical guide to machine-learning scoring for structure-based virtual screening

In the format provided by the  
authors and unedited

**Supplementary Table 1.** SBVS performance of four generic SFs (Smina, IFP, CNN-Score, RF-Score-VS) on three DEKOIS 2.0 benchmarks (ACHE, HMGR, PPARA).

|                             | ACHE         | HMGR         | PPARA        |
|-----------------------------|--------------|--------------|--------------|
| - Number of actives         | 40           | 40           | 40           |
| - Number of decoys          | 1200         | 1200         | 1200         |
| - Total number of molecules | 1240         | 1240         | 1240         |
| - Maximal EF1%              | 30.00        | 30.00        | 30.00        |
| <b>Smina:</b>               |              |              |              |
| - EF1%                      | 15.00        | 2.50         | 0.00         |
| - <b>NEF1%</b>              | <b>0.500</b> | <b>0.083</b> | <b>0.000</b> |
| <b>IFP:</b>                 |              |              |              |
| - EF1%                      | 15.00        | 10.00        | 0.00         |
| - <b>NEF1%</b>              | <b>0.500</b> | <b>0.333</b> | <b>0.000</b> |
| <b>CNN-Score:</b>           |              |              |              |
| - EF1%                      | 0.00         | 7.50         | 10.00        |
| - <b>NEF1%</b>              | <b>0.000</b> | <b>0.250</b> | <b>0.333</b> |
| <b>RF-Score-VS:</b>         |              |              |              |
| - EF1%                      | 2.50         | 30.00        | 12.50        |
| - <b>NEF1%</b>              | <b>0.083</b> | <b>1.000</b> | <b>0.417</b> |

**Supplementary Figure 1.** Distribution plots of seven physico-chemical properties calculated from all molecules of the ACHE ligand set.

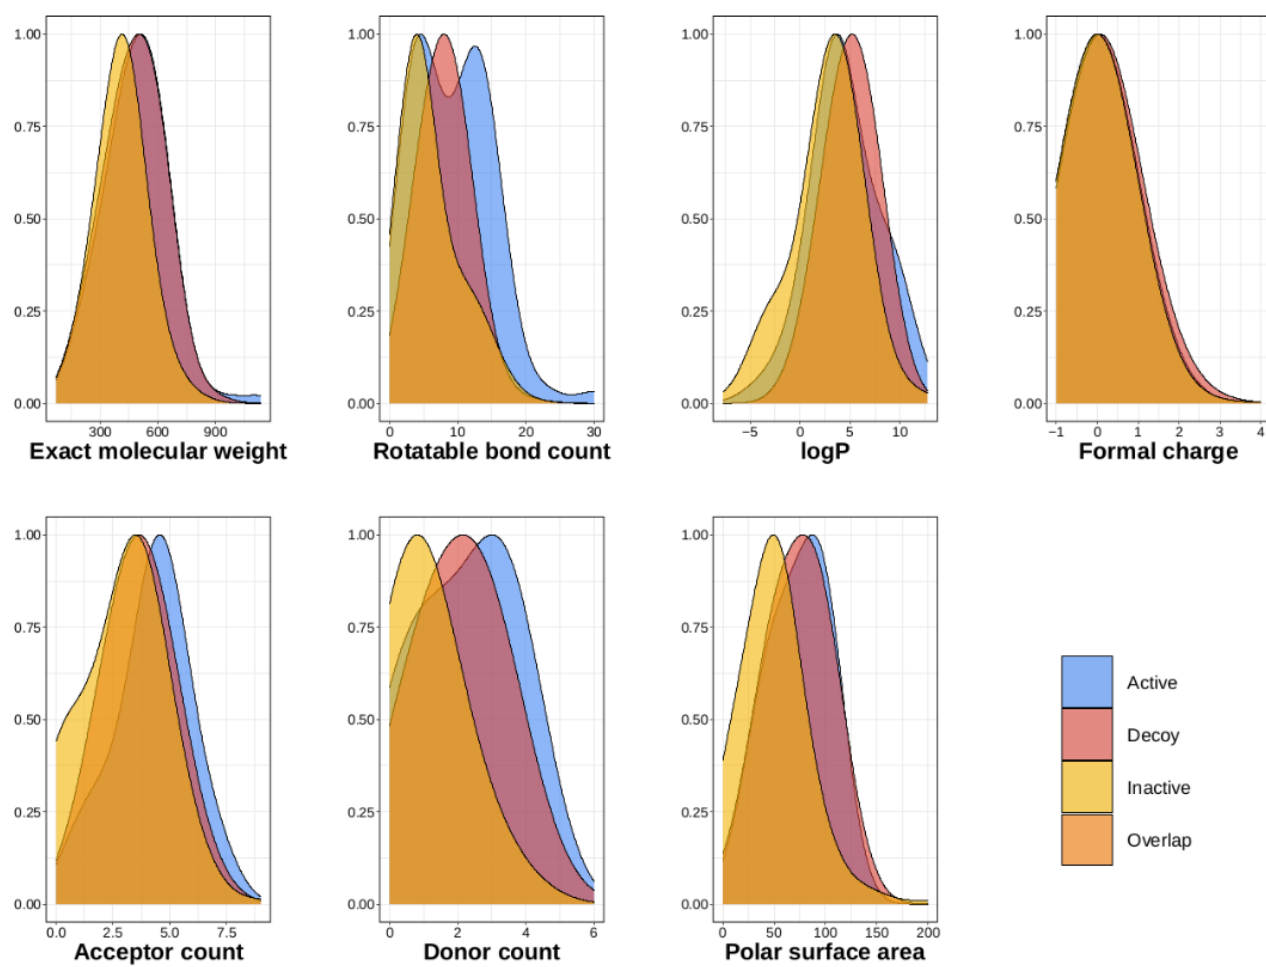

**Supplementary Figure 2.** Distribution plots of seven physico-chemical properties calculated from all molecules of the HMGR ligand set.

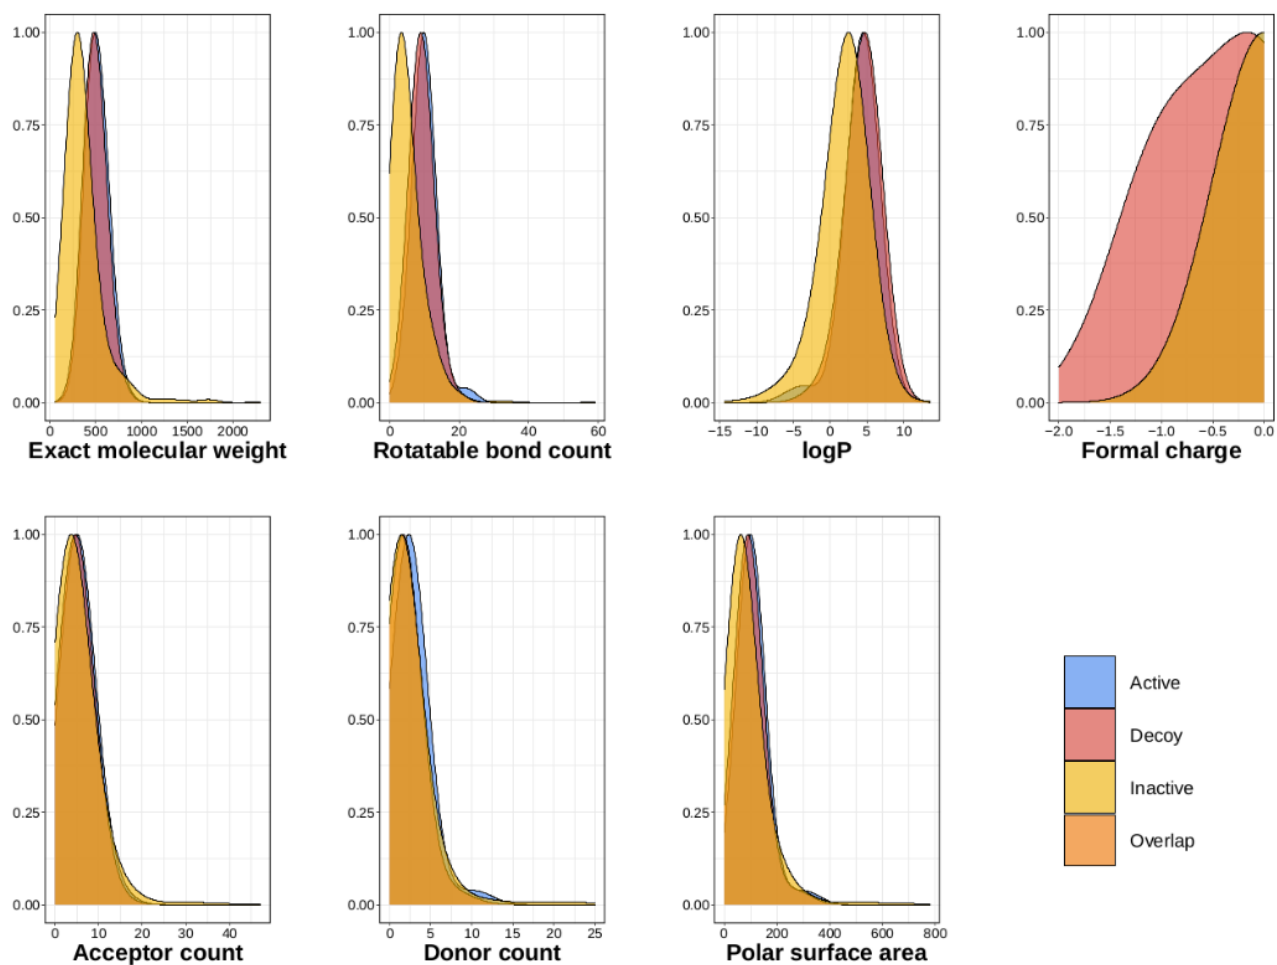

**Supplementary Table 2.** List of all active molecules of the users' own PPARA benchmark ( $n = 1115$ ) and their partition into the test set and the training set according to their clusters (OTS option).

| Cluster group | ID            | Data set |
|---------------|---------------|----------|
| 118           | CHEMBL260627  | Test     |
| 125           | CHEMBL400625  | Test     |
| 127           | CHEMBL2237300 | Test     |
| 128           | CHEMBL4083589 | Test     |
| 132           | CHEMBL1934468 | Test     |
| 144           | CHEMBL280897  | Test     |
| 145           | CHEMBL252995  | Test     |
| 150           | CHEMBL198579  | Test     |
| 155           | CHEMBL205777  | Test     |
| 156           | CHEMBL472451  | Test     |
| 157           | CHEMBL192500  | Test     |
| 158           | CHEMBL278994  | Test     |
| 159           | CHEMBL410478  | Test     |
| 160           | CHEMBL3780740 | Test     |
| 161           | CHEMBL2037182 | Test     |
| 162           | CHEMBL2037008 | Test     |
| 163           | CHEMBL4571975 | Test     |
| 164           | CHEMBL4104138 | Test     |
| 165           | CHEMBL4101577 | Test     |
| 166           | CHEMBL4100619 | Test     |
| 167           | CHEMBL3982782 | Test     |
| 168           | CHEMBL3735011 | Test     |
| 169           | CHEMBL3601096 | Test     |
| 170           | CHEMBL3397563 | Test     |
| 171           | CHEMBL3354988 | Test     |
| 172           | CHEMBL3354987 | Test     |
| 173           | CHEMBL2069935 | Test     |
| 174           | CHEMBL1934308 | Test     |
| 175           | CHEMBL1927476 | Test     |
| 176           | CHEMBL1760555 | Test     |
| 177           | CHEMBL1720494 | Test     |
| 178           | CHEMBL1494365 | Test     |
| 179           | CHEMBL1089633 | Test     |
| 180           | CHEMBL1080361 | Test     |
| 181           | CHEMBL1079489 | Test     |
| 182           | CHEMBL1075683 | Test     |
| 183           | CHEMBL584704  | Test     |
| 184           | CHEMBL572795  | Test     |
| 185           | CHEMBL526740  | Test     |
| 186           | CHEMBL438346  | Test     |
| 187           | CHEMBL426883  | Test     |
| 188           | CHEMBL401811  | Test     |
| 189           | CHEMBL401562  | Test     |
| 190           | CHEMBL374948  | Test     |
| 191           | CHEMBL318696  | Test     |
| 192           | CHEMBL306229  | Test     |
| 193           | CHEMBL272017  | Test     |
| 194           | CHEMBL250673  | Test     |
| 195           | CHEMBL249865  | Test     |

|     |               |          |
|-----|---------------|----------|
| 196 | CHEMBL219156  | Test     |
| 197 | CHEMBL213355  | Test     |
| 198 | CHEMBL207569  | Test     |
| 199 | CHEMBL202631  | Test     |
| 200 | CHEMBL198929  | Test     |
| 201 | CHEMBL198786  | Test     |
| 202 | CHEMBL194698  | Test     |
| 203 | CHEMBL190739  | Test     |
| 204 | CHEMBL190645  | Test     |
| 205 | CHEMBL39687   | Test     |
| 206 | CHEMBL496744  | Test     |
| 207 | CHEMBL491039  | Test     |
| 208 | CHEMBL391085  | Test     |
| 209 | CHEMBL391084  | Test     |
| 210 | CHEMBL593087  | Test     |
| 211 | CHEMBL257345  | Test     |
| 212 | CHEMBL221529  | Test     |
| 213 | CHEMBL148797  | Test     |
| 214 | CHEMBL2113219 | Test     |
| 215 | CHEMBL383011  | Test     |
| 216 | CHEMBL255872  | Test     |
| 217 | CHEMBL3707395 | Test     |
| 218 | CHEMBL592054  | Test     |
| 219 | CHEMBL426878  | Test     |
| 220 | CHEMBL242007  | Test     |
| 221 | CHEMBL148319  | Test     |
| 222 | CHEMBL214921  | Test     |
| 223 | CHEMBL221044  | Test     |
| 224 | CHEMBL424133  | Test     |
| 225 | CHEMBL280065  | Test     |
| 226 | CHEMBL24458   | Test     |
| 0   | CHEMBL107789  | Training |
| 0   | CHEMBL118939  | Training |
| 0   | CHEMBL120009  | Training |
| 0   | CHEMBL202118  | Training |
| 0   | CHEMBL375471  | Training |
| 0   | CHEMBL120246  | Training |
| 0   | CHEMBL120456  | Training |
| 0   | CHEMBL255392  | Training |
| 0   | CHEMBL270587  | Training |
| 0   | CHEMBL331206  | Training |
| 0   | CHEMBL332465  | Training |
| 0   | CHEMBL382655  | Training |
| 0   | CHEMBL387914  | Training |
| 0   | CHEMBL402161  | Training |
| 0   | CHEMBL427071  | Training |
| 0   | CHEMBL116540  | Training |
| 0   | CHEMBL120611  | Training |
| 0   | CHEMBL201803  | Training |
| 0   | CHEMBL201832  | Training |
| 0   | CHEMBL202609  | Training |
| 0   | CHEMBL229525  | Training |
| 0   | CHEMBL229573  | Training |
| 0   | CHEMBL229778  | Training |

|   |               |          |
|---|---------------|----------|
| 0 | CHEMBL229785  | Training |
| 0 | CHEMBL229786  | Training |
| 0 | CHEMBL229836  | Training |
| 0 | CHEMBL229837  | Training |
| 0 | CHEMBL229888  | Training |
| 0 | CHEMBL262558  | Training |
| 0 | CHEMBL270801  | Training |
| 0 | CHEMBL271877  | Training |
| 0 | CHEMBL376165  | Training |
| 0 | CHEMBL389903  | Training |
| 0 | CHEMBL390116  | Training |
| 0 | CHEMBL425666  | Training |
| 0 | CHEMBL426483  | Training |
| 0 | CHEMBL455957  | Training |
| 0 | CHEMBL462982  | Training |
| 0 | CHEMBL1222408 | Training |
| 0 | CHEMBL1779473 | Training |
| 0 | CHEMBL1779474 | Training |
| 0 | CHEMBL1779476 | Training |
| 0 | CHEMBL1779478 | Training |
| 0 | CHEMBL1779479 | Training |
| 0 | CHEMBL1779480 | Training |
| 0 | CHEMBL1779481 | Training |
| 0 | CHEMBL1779482 | Training |
| 0 | CHEMBL1956149 | Training |
| 1 | CHEMBL1089501 | Training |
| 1 | CHEMBL1089210 | Training |
| 1 | CHEMBL3828718 | Training |
| 1 | CHEMBL1088910 | Training |
| 1 | CHEMBL1089164 | Training |
| 1 | CHEMBL1089500 | Training |
| 1 | CHEMBL1090189 | Training |
| 1 | CHEMBL1090211 | Training |
| 1 | CHEMBL1090878 | Training |
| 1 | CHEMBL1091196 | Training |
| 1 | CHEMBL1091218 | Training |
| 1 | CHEMBL1091980 | Training |
| 1 | CHEMBL1092235 | Training |
| 1 | CHEMBL1092236 | Training |
| 1 | CHEMBL1092237 | Training |
| 1 | CHEMBL1092931 | Training |
| 1 | CHEMBL3827820 | Training |
| 1 | CHEMBL1088911 | Training |
| 1 | CHEMBL1090877 | Training |
| 1 | CHEMBL1087466 | Training |
| 1 | CHEMBL1087467 | Training |
| 1 | CHEMBL1087580 | Training |
| 1 | CHEMBL1087582 | Training |
| 1 | CHEMBL1089969 | Training |
| 1 | CHEMBL1090187 | Training |
| 1 | CHEMBL1092932 | Training |
| 1 | CHEMBL1097193 | Training |
| 1 | CHEMBL1097194 | Training |
| 1 | CHEMBL1097195 | Training |

|   |               |          |
|---|---------------|----------|
| 1 | CHEMBL3826990 | Training |
| 1 | CHEMBL3827050 | Training |
| 1 | CHEMBL3827241 | Training |
| 1 | CHEMBL3827335 | Training |
| 1 | CHEMBL3827378 | Training |
| 1 | CHEMBL3827510 | Training |
| 1 | CHEMBL3827584 | Training |
| 1 | CHEMBL3827617 | Training |
| 1 | CHEMBL3827740 | Training |
| 1 | CHEMBL3827940 | Training |
| 1 | CHEMBL3828133 | Training |
| 1 | CHEMBL3828201 | Training |
| 1 | CHEMBL3828232 | Training |
| 1 | CHEMBL3828330 | Training |
| 1 | CHEMBL3828487 | Training |
| 2 | CHEMBL112725  | Training |
| 2 | CHEMBL361424  | Training |
| 2 | CHEMBL435343  | Training |
| 2 | CHEMBL367891  | Training |
| 2 | CHEMBL360246  | Training |
| 2 | CHEMBL367549  | Training |
| 2 | CHEMBL190603  | Training |
| 2 | CHEMBL192582  | Training |
| 2 | CHEMBL192638  | Training |
| 2 | CHEMBL366145  | Training |
| 2 | CHEMBL111480  | Training |
| 2 | CHEMBL112973  | Training |
| 2 | CHEMBL176222  | Training |
| 2 | CHEMBL178513  | Training |
| 2 | CHEMBL178630  | Training |
| 2 | CHEMBL179180  | Training |
| 2 | CHEMBL179452  | Training |
| 2 | CHEMBL179657  | Training |
| 2 | CHEMBL180912  | Training |
| 2 | CHEMBL360231  | Training |
| 2 | CHEMBL360240  | Training |
| 2 | CHEMBL360992  | Training |
| 2 | CHEMBL361166  | Training |
| 2 | CHEMBL426592  | Training |
| 2 | CHEMBL447190  | Training |
| 2 | CHEMBL109638  | Training |
| 2 | CHEMBL176075  | Training |
| 2 | CHEMBL178309  | Training |
| 2 | CHEMBL179622  | Training |
| 2 | CHEMBL326873  | Training |
| 2 | CHEMBL2037079 | Training |
| 2 | CHEMBL111161  | Training |
| 2 | CHEMBL178659  | Training |
| 2 | CHEMBL369289  | Training |
| 2 | CHEMBL370024  | Training |
| 3 | CHEMBL191275  | Training |
| 3 | CHEMBL489074  | Training |
| 3 | CHEMBL192518  | Training |
| 3 | CHEMBL489075  | Training |



|   |               |          |
|---|---------------|----------|
| 3 | CHEMBL191060  | Training |
| 3 | CHEMBL189116  | Training |
| 3 | CHEMBL470145  | Training |
| 3 | CHEMBL472244  | Training |
| 3 | CHEMBL513244  | Training |
| 3 | CHEMBL572565  | Training |
| 3 | CHEMBL572566  | Training |
| 3 | CHEMBL572794  | Training |
| 3 | CHEMBL573015  | Training |
| 3 | CHEMBL573252  | Training |
| 3 | CHEMBL574386  | Training |
| 3 | CHEMBL574607  | Training |
| 3 | CHEMBL578860  | Training |
| 3 | CHEMBL2312700 | Training |
| 3 | CHEMBL2312701 | Training |
| 3 | CHEMBL2312702 | Training |
| 3 | CHEMBL2312703 | Training |
| 3 | CHEMBL2312704 | Training |
| 3 | CHEMBL2312705 | Training |
| 3 | CHEMBL2312706 | Training |
| 3 | CHEMBL2312707 | Training |
| 3 | CHEMBL2312708 | Training |
| 3 | CHEMBL2312711 | Training |
| 3 | CHEMBL2312712 | Training |
| 3 | CHEMBL2312713 | Training |
| 3 | CHEMBL2312714 | Training |
| 3 | CHEMBL2312715 | Training |
| 3 | CHEMBL2312716 | Training |
| 3 | CHEMBL2312717 | Training |
| 3 | CHEMBL2312718 | Training |
| 3 | CHEMBL2375951 | Training |
| 4 | CHEMBL247951  | Training |
| 4 | CHEMBL245464  | Training |
| 4 | CHEMBL245465  | Training |
| 4 | CHEMBL245664  | Training |
| 4 | CHEMBL245865  | Training |
| 4 | CHEMBL245866  | Training |
| 4 | CHEMBL246069  | Training |
| 4 | CHEMBL246070  | Training |
| 4 | CHEMBL246281  | Training |
| 4 | CHEMBL246282  | Training |
| 4 | CHEMBL246510  | Training |
| 4 | CHEMBL247748  | Training |
| 4 | CHEMBL247749  | Training |
| 4 | CHEMBL247952  | Training |
| 4 | CHEMBL248117  | Training |
| 4 | CHEMBL248324  | Training |
| 4 | CHEMBL248325  | Training |
| 4 | CHEMBL248326  | Training |
| 4 | CHEMBL248526  | Training |
| 4 | CHEMBL248527  | Training |
| 4 | CHEMBL391620  | Training |
| 4 | CHEMBL391622  | Training |
| 4 | CHEMBL392810  | Training |

|   |               |          |
|---|---------------|----------|
| 4 | CHEMBL392811  | Training |
| 4 | CHEMBL394296  | Training |
| 4 | CHEMBL395924  | Training |
| 4 | CHEMBL398117  | Training |
| 4 | CHEMBL398118  | Training |
| 4 | CHEMBL427701  | Training |
| 4 | CHEMBL429824  | Training |
| 4 | CHEMBL477119  | Training |
| 4 | CHEMBL477312  | Training |
| 4 | CHEMBL479207  | Training |
| 5 | CHEMBL247919  | Training |
| 5 | CHEMBL248118  | Training |
| 6 | CHEMBL318351  | Training |
| 6 | CHEMBL116947  | Training |
| 6 | CHEMBL119791  | Training |
| 6 | CHEMBL122070  | Training |
| 6 | CHEMBL3764076 | Training |
| 7 | CHEMBL482740  | Training |
| 7 | CHEMBL483341  | Training |
| 7 | CHEMBL484330  | Training |
| 7 | CHEMBL484409  | Training |
| 7 | CHEMBL484606  | Training |
| 7 | CHEMBL484607  | Training |
| 7 | CHEMBL484725  | Training |
| 7 | CHEMBL485187  | Training |
| 7 | CHEMBL485188  | Training |
| 7 | CHEMBL485537  | Training |
| 7 | CHEMBL519032  | Training |
| 7 | CHEMBL519351  | Training |
| 7 | CHEMBL519802  | Training |
| 7 | CHEMBL521170  | Training |
| 7 | CHEMBL521462  | Training |
| 7 | CHEMBL484000  | Training |
| 7 | CHEMBL484001  | Training |
| 7 | CHEMBL484137  | Training |
| 7 | CHEMBL484962  | Training |
| 7 | CHEMBL519504  | Training |
| 7 | CHEMBL519974  | Training |
| 7 | CHEMBL521007  | Training |
| 7 | CHEMBL482993  | Training |
| 7 | CHEMBL484138  | Training |
| 7 | CHEMBL1813008 | Training |
| 7 | CHEMBL1813009 | Training |
| 7 | CHEMBL1813012 | Training |
| 8 | CHEMBL428574  | Training |
| 9 | CHEMBL209546  | Training |
| 9 | CHEMBL209749  | Training |
| 9 | CHEMBL210017  | Training |
| 9 | CHEMBL210163  | Training |
| 9 | CHEMBL211371  | Training |
| 9 | CHEMBL213487  | Training |
| 9 | CHEMBL213602  | Training |
| 9 | CHEMBL213675  | Training |
| 9 | CHEMBL213678  | Training |

|    |               |          |
|----|---------------|----------|
| 9  | CHEMBL213902  | Training |
| 9  | CHEMBL214272  | Training |
| 9  | CHEMBL265364  | Training |
| 9  | CHEMBL378705  | Training |
| 9  | CHEMBL380070  | Training |
| 9  | CHEMBL384203  | Training |
| 9  | CHEMBL387023  | Training |
| 9  | CHEMBL211513  | Training |
| 9  | CHEMBL211839  | Training |
| 9  | CHEMBL377898  | Training |
| 9  | CHEMBL380404  | Training |
| 9  | CHEMBL2037078 | Training |
| 9  | CHEMBL2037080 | Training |
| 9  | CHEMBL2037081 | Training |
| 9  | CHEMBL2037083 | Training |
| 10 | CHEMBL81248   | Training |
| 10 | CHEMBL82034   | Training |
| 10 | CHEMBL81592   | Training |
| 10 | CHEMBL412371  | Training |
| 10 | CHEMBL246272  | Training |
| 10 | CHEMBL246473  | Training |
| 10 | CHEMBL247925  | Training |
| 10 | CHEMBL247926  | Training |
| 10 | CHEMBL394967  | Training |
| 10 | CHEMBL395191  | Training |
| 10 | CHEMBL396694  | Training |
| 10 | CHEMBL428748  | Training |
| 10 | CHEMBL429823  | Training |
| 10 | CHEMBL245656  | Training |
| 10 | CHEMBL245674  | Training |
| 10 | CHEMBL246270  | Training |
| 10 | CHEMBL394947  | Training |
| 10 | CHEMBL396696  | Training |
| 10 | CHEMBL557580  | Training |
| 10 | CHEMBL394948  | Training |
| 10 | CHEMBL394968  | Training |
| 10 | CHEMBL397120  | Training |
| 11 | CHEMBL180019  | Training |
| 11 | CHEMBL369725  | Training |
| 11 | CHEMBL190968  | Training |
| 11 | CHEMBL178909  | Training |
| 11 | CHEMBL182200  | Training |
| 12 | CHEMBL76676   | Training |
| 12 | CHEMBL78442   | Training |
| 12 | CHEMBL78476   | Training |
| 12 | CHEMBL78523   | Training |
| 12 | CHEMBL80301   | Training |
| 12 | CHEMBL80364   | Training |
| 12 | CHEMBL80671   | Training |
| 12 | CHEMBL80772   | Training |
| 12 | CHEMBL80791   | Training |
| 12 | CHEMBL80905   | Training |
| 12 | CHEMBL80979   | Training |
| 12 | CHEMBL305723  | Training |

|    |               |          |
|----|---------------|----------|
| 12 | CHEMBL305854  | Training |
| 12 | CHEMBL309778  | Training |
| 12 | CHEMBL310426  | Training |
| 12 | CHEMBL310962  | Training |
| 12 | CHEMBL311429  | Training |
| 12 | CHEMBL312791  | Training |
| 12 | CHEMBL433306  | Training |
| 12 | CHEMBL433316  | Training |
| 12 | CHEMBL189146  | Training |
| 12 | CHEMBL2237303 | Training |
| 13 | CHEMBL402840  | Training |
| 13 | CHEMBL272137  | Training |
| 13 | CHEMBL270451  | Training |
| 13 | CHEMBL270664  | Training |
| 13 | CHEMBL270665  | Training |
| 13 | CHEMBL402841  | Training |
| 13 | CHEMBL456355  | Training |
| 13 | CHEMBL456752  | Training |
| 13 | CHEMBL456753  | Training |
| 13 | CHEMBL456973  | Training |
| 13 | CHEMBL456974  | Training |
| 13 | CHEMBL457405  | Training |
| 13 | CHEMBL457623  | Training |
| 13 | CHEMBL514256  | Training |
| 13 | CHEMBL514264  | Training |
| 13 | CHEMBL2158959 | Training |
| 14 | CHEMBL173159  | Training |
| 14 | CHEMBL435523  | Training |
| 14 | CHEMBL172492  | Training |
| 14 | CHEMBL172931  | Training |
| 14 | CHEMBL173236  | Training |
| 14 | CHEMBL173285  | Training |
| 14 | CHEMBL173386  | Training |
| 14 | CHEMBL173409  | Training |
| 14 | CHEMBL173494  | Training |
| 14 | CHEMBL174764  | Training |
| 14 | CHEMBL367019  | Training |
| 14 | CHEMBL369053  | Training |
| 14 | CHEMBL369607  | Training |
| 14 | CHEMBL172490  | Training |
| 14 | CHEMBL175332  | Training |
| 14 | CHEMBL263029  | Training |
| 14 | CHEMBL367311  | Training |
| 14 | CHEMBL368371  | Training |
| 14 | CHEMBL435715  | Training |
| 14 | CHEMBL197496  | Training |
| 14 | CHEMBL198529  | Training |
| 15 | CHEMBL77502   | Training |
| 15 | CHEMBL25259   | Training |
| 15 | CHEMBL312717  | Training |
| 15 | CHEMBL82602   | Training |
| 15 | CHEMBL81676   | Training |
| 15 | CHEMBL321634  | Training |
| 15 | CHEMBL79426   | Training |

|    |               |          |
|----|---------------|----------|
| 15 | CHEMBL264385  | Training |
| 15 | CHEMBL66206   | Training |
| 15 | CHEMBL78529   | Training |
| 15 | CHEMBL189712  | Training |
| 15 | CHEMBL309882  | Training |
| 15 | CHEMBL222121  | Training |
| 15 | CHEMBL363018  | Training |
| 15 | CHEMBL2204610 | Training |
| 15 | CHEMBL2237301 | Training |
| 15 | CHEMBL2037007 | Training |
| 16 | CHEMBL230304  | Training |
| 16 | CHEMBL230305  | Training |
| 16 | CHEMBL230409  | Training |
| 16 | CHEMBL230410  | Training |
| 16 | CHEMBL230411  | Training |
| 16 | CHEMBL230517  | Training |
| 16 | CHEMBL230518  | Training |
| 16 | CHEMBL230622  | Training |
| 16 | CHEMBL230623  | Training |
| 16 | CHEMBL230705  | Training |
| 16 | CHEMBL230706  | Training |
| 16 | CHEMBL230707  | Training |
| 16 | CHEMBL230814  | Training |
| 16 | CHEMBL231425  | Training |
| 16 | CHEMBL231523  | Training |
| 16 | CHEMBL388008  | Training |
| 16 | CHEMBL388422  | Training |
| 16 | CHEMBL388645  | Training |
| 16 | CHEMBL389297  | Training |
| 16 | CHEMBL389298  | Training |
| 17 | CHEMBL4463341 | Training |
| 17 | CHEMBL4245047 | Training |
| 17 | CHEMBL4437601 | Training |
| 17 | CHEMBL4443452 | Training |
| 17 | CHEMBL4448458 | Training |
| 17 | CHEMBL4448658 | Training |
| 17 | CHEMBL4454550 | Training |
| 17 | CHEMBL4455529 | Training |
| 17 | CHEMBL4455560 | Training |
| 17 | CHEMBL4465958 | Training |
| 17 | CHEMBL4466987 | Training |
| 17 | CHEMBL4468237 | Training |
| 17 | CHEMBL4468359 | Training |
| 17 | CHEMBL4540905 | Training |
| 17 | CHEMBL4550448 | Training |
| 17 | CHEMBL4561177 | Training |
| 17 | CHEMBL4564731 | Training |
| 17 | CHEMBL4591150 | Training |
| 17 | CHEMBL4592059 | Training |
| 18 | CHEMBL1089176 | Training |
| 18 | CHEMBL253952  | Training |
| 19 | CHEMBL3398436 | Training |
| 19 | CHEMBL3398444 | Training |
| 19 | CHEMBL3398438 | Training |

|    |               |          |
|----|---------------|----------|
| 19 | CHEMBL3398443 | Training |
| 19 | CHEMBL3398439 | Training |
| 19 | CHEMBL3398445 | Training |
| 19 | CHEMBL3398459 | Training |
| 19 | CHEMBL257164  | Training |
| 19 | CHEMBL3398440 | Training |
| 19 | CHEMBL3398442 | Training |
| 19 | CHEMBL3398455 | Training |
| 19 | CHEMBL3398456 | Training |
| 19 | CHEMBL3398458 | Training |
| 19 | CHEMBL3398460 | Training |
| 19 | CHEMBL3398461 | Training |
| 19 | CHEMBL3398462 | Training |
| 19 | CHEMBL3398463 | Training |
| 20 | CHEMBL454678  | Training |
| 20 | CHEMBL455157  | Training |
| 20 | CHEMBL457062  | Training |
| 20 | CHEMBL460278  | Training |
| 20 | CHEMBL462554  | Training |
| 20 | CHEMBL462580  | Training |
| 20 | CHEMBL470322  | Training |
| 20 | CHEMBL471533  | Training |
| 20 | CHEMBL472399  | Training |
| 20 | CHEMBL472571  | Training |
| 20 | CHEMBL473300  | Training |
| 20 | CHEMBL513035  | Training |
| 20 | CHEMBL513594  | Training |
| 20 | CHEMBL515667  | Training |
| 20 | CHEMBL516824  | Training |
| 20 | CHEMBL516964  | Training |
| 20 | CHEMBL518348  | Training |
| 21 | CHEMBL87307   | Training |
| 21 | CHEMBL87380   | Training |
| 21 | CHEMBL421729  | Training |
| 21 | CHEMBL420973  | Training |
| 21 | CHEMBL144489  | Training |
| 21 | CHEMBL245454  | Training |
| 21 | CHEMBL246279  | Training |
| 21 | CHEMBL246485  | Training |
| 21 | CHEMBL247110  | Training |
| 21 | CHEMBL247111  | Training |
| 21 | CHEMBL247314  | Training |
| 21 | CHEMBL247937  | Training |
| 21 | CHEMBL248112  | Training |
| 21 | CHEMBL248113  | Training |
| 21 | CHEMBL248318  | Training |
| 21 | CHEMBL396154  | Training |
| 21 | CHEMBL397331  | Training |
| 22 | CHEMBL373874  | Training |
| 22 | CHEMBL483351  | Training |
| 22 | CHEMBL508299  | Training |
| 22 | CHEMBL484329  | Training |
| 22 | CHEMBL521131  | Training |
| 23 | CHEMBL1090188 | Training |

|    |               |          |
|----|---------------|----------|
| 23 | CHEMBL1089970 | Training |
| 24 | CHEMBL401616  | Training |
| 24 | CHEMBL270835  | Training |
| 24 | CHEMBL270961  | Training |
| 24 | CHEMBL271394  | Training |
| 24 | CHEMBL271775  | Training |
| 24 | CHEMBL271776  | Training |
| 24 | CHEMBL271873  | Training |
| 24 | CHEMBL272175  | Training |
| 24 | CHEMBL272466  | Training |
| 24 | CHEMBL273035  | Training |
| 24 | CHEMBL273036  | Training |
| 24 | CHEMBL407950  | Training |
| 24 | CHEMBL410704  | Training |
| 24 | CHEMBL410705  | Training |
| 24 | CHEMBL447533  | Training |
| 24 | CHEMBL513145  | Training |
| 25 | CHEMBL217907  | Training |
| 25 | CHEMBL220533  | Training |
| 25 | CHEMBL221123  | Training |
| 25 | CHEMBL221184  | Training |
| 25 | CHEMBL221474  | Training |
| 25 | CHEMBL221525  | Training |
| 25 | CHEMBL221641  | Training |
| 25 | CHEMBL221649  | Training |
| 25 | CHEMBL374448  | Training |
| 25 | CHEMBL386957  | Training |
| 25 | CHEMBL425639  | Training |
| 25 | CHEMBL426550  | Training |
| 25 | CHEMBL221388  | Training |
| 25 | CHEMBL218487  | Training |
| 25 | CHEMBL220655  | Training |
| 25 | CHEMBL221489  | Training |
| 26 | CHEMBL232597  | Training |
| 26 | CHEMBL244573  | Training |
| 26 | CHEMBL244574  | Training |
| 26 | CHEMBL244575  | Training |
| 26 | CHEMBL395560  | Training |
| 26 | CHEMBL396496  | Training |
| 26 | CHEMBL428037  | Training |
| 26 | CHEMBL244786  | Training |
| 26 | CHEMBL258832  | Training |
| 26 | CHEMBL259055  | Training |
| 26 | CHEMBL259856  | Training |
| 26 | CHEMBL261555  | Training |
| 26 | CHEMBL408941  | Training |
| 26 | CHEMBL409355  | Training |
| 26 | CHEMBL409513  | Training |
| 26 | CHEMBL411045  | Training |
| 27 | CHEMBL219586  | Training |
| 27 | CHEMBL221074  | Training |
| 27 | CHEMBL218094  | Training |
| 27 | CHEMBL218637  | Training |
| 27 | CHEMBL218687  | Training |

|    |               |          |
|----|---------------|----------|
| 27 | CHEMBL218691  | Training |
| 27 | CHEMBL218784  | Training |
| 27 | CHEMBL219587  | Training |
| 27 | CHEMBL219626  | Training |
| 27 | CHEMBL220281  | Training |
| 27 | CHEMBL220926  | Training |
| 27 | CHEMBL221201  | Training |
| 27 | CHEMBL375760  | Training |
| 27 | CHEMBL375761  | Training |
| 27 | CHEMBL376641  | Training |
| 27 | CHEMBL3354989 | Training |
| 28 | CHEMBL549723  | Training |
| 28 | CHEMBL550332  | Training |
| 28 | CHEMBL551420  | Training |
| 28 | CHEMBL551479  | Training |
| 28 | CHEMBL551884  | Training |
| 28 | CHEMBL552347  | Training |
| 28 | CHEMBL557342  | Training |
| 28 | CHEMBL558072  | Training |
| 28 | CHEMBL558141  | Training |
| 28 | CHEMBL560205  | Training |
| 28 | CHEMBL560484  | Training |
| 28 | CHEMBL561544  | Training |
| 28 | CHEMBL563351  | Training |
| 28 | CHEMBL563546  | Training |
| 28 | CHEMBL564017  | Training |
| 29 | CHEMBL201880  | Training |
| 29 | CHEMBL201036  | Training |
| 29 | CHEMBL437479  | Training |
| 29 | CHEMBL216395  | Training |
| 29 | CHEMBL384746  | Training |
| 29 | CHEMBL414868  | Training |
| 29 | CHEMBL446489  | Training |
| 29 | CHEMBL451216  | Training |
| 29 | CHEMBL454508  | Training |
| 29 | CHEMBL492324  | Training |
| 29 | CHEMBL492534  | Training |
| 29 | CHEMBL492535  | Training |
| 29 | CHEMBL494142  | Training |
| 29 | CHEMBL506730  | Training |
| 29 | CHEMBL522366  | Training |
| 30 | CHEMBL189110  | Training |
| 30 | CHEMBL190334  | Training |
| 30 | CHEMBL192609  | Training |
| 30 | CHEMBL363780  | Training |
| 30 | CHEMBL425725  | Training |
| 30 | CHEMBL426269  | Training |
| 30 | CHEMBL190976  | Training |
| 31 | CHEMBL94306   | Training |
| 31 | CHEMBL96143   | Training |
| 31 | CHEMBL96451   | Training |
| 31 | CHEMBL318684  | Training |
| 31 | CHEMBL328615  | Training |
| 31 | CHEMBL420441  | Training |



|    |               |          |
|----|---------------|----------|
| 31 | CHEMBL117738  | Training |
| 31 | CHEMBL119496  | Training |
| 31 | CHEMBL122418  | Training |
| 31 | CHEMBL2037009 | Training |
| 31 | CHEMBL2037010 | Training |
| 31 | CHEMBL1783034 | Training |
| 31 | CHEMBL2037181 | Training |
| 31 | CHEMBL2037183 | Training |
| 32 | CHEMBL2204593 | Training |
| 32 | CHEMBL2204594 | Training |
| 32 | CHEMBL2204595 | Training |
| 32 | CHEMBL2204596 | Training |
| 32 | CHEMBL2204597 | Training |
| 32 | CHEMBL2204598 | Training |
| 32 | CHEMBL2204599 | Training |
| 32 | CHEMBL2204600 | Training |
| 32 | CHEMBL2204602 | Training |
| 32 | CHEMBL2204603 | Training |
| 32 | CHEMBL2204604 | Training |
| 32 | CHEMBL2204605 | Training |
| 33 | CHEMBL1934476 | Training |
| 33 | CHEMBL1934484 | Training |
| 33 | CHEMBL1934310 | Training |
| 33 | CHEMBL1934312 | Training |
| 33 | CHEMBL1934313 | Training |
| 33 | CHEMBL1934317 | Training |
| 33 | CHEMBL1934472 | Training |
| 33 | CHEMBL1934480 | Training |
| 33 | CHEMBL1934481 | Training |
| 33 | CHEMBL1934482 | Training |
| 33 | CHEMBL1934483 | Training |
| 33 | CHEMBL1934485 | Training |
| 33 | CHEMBL1934486 | Training |
| 34 | CHEMBL1087587 | Training |
| 34 | CHEMBL1088098 | Training |
| 34 | CHEMBL1088099 | Training |
| 34 | CHEMBL1088114 | Training |
| 34 | CHEMBL1088246 | Training |
| 34 | CHEMBL1088257 | Training |
| 34 | CHEMBL1088515 | Training |
| 35 | CHEMBL205665  | Training |
| 35 | CHEMBL203409  | Training |
| 35 | CHEMBL424674  | Training |
| 35 | CHEMBL424685  | Training |
| 35 | CHEMBL202739  | Training |
| 35 | CHEMBL202973  | Training |
| 35 | CHEMBL203338  | Training |
| 35 | CHEMBL203408  | Training |
| 35 | CHEMBL203621  | Training |
| 35 | CHEMBL205803  | Training |
| 35 | CHEMBL206202  | Training |
| 35 | CHEMBL206759  | Training |
| 35 | CHEMBL382178  | Training |
| 36 | CHEMBL255388  | Training |

|    |               |          |
|----|---------------|----------|
| 36 | CHEMBL256468  | Training |
| 36 | CHEMBL257517  | Training |
| 36 | CHEMBL271240  | Training |
| 36 | CHEMBL271739  | Training |
| 36 | CHEMBL272336  | Training |
| 36 | CHEMBL272962  | Training |
| 36 | CHEMBL403847  | Training |
| 36 | CHEMBL404451  | Training |
| 36 | CHEMBL404646  | Training |
| 36 | CHEMBL411118  | Training |
| 36 | CHEMBL429734  | Training |
| 37 | CHEMBL253416  | Training |
| 37 | CHEMBL253417  | Training |
| 37 | CHEMBL253851  | Training |
| 37 | CHEMBL254054  | Training |
| 37 | CHEMBL398677  | Training |
| 37 | CHEMBL399629  | Training |
| 37 | CHEMBL252996  | Training |
| 37 | CHEMBL537921  | Training |
| 37 | CHEMBL554562  | Training |
| 37 | CHEMBL556643  | Training |
| 37 | CHEMBL562659  | Training |
| 37 | CHEMBL565198  | Training |
| 38 | CHEMBL3901479 | Training |
| 38 | CHEMBL3905544 | Training |
| 38 | CHEMBL3920527 | Training |
| 38 | CHEMBL3957862 | Training |
| 38 | CHEMBL3981588 | Training |
| 38 | CHEMBL4093975 | Training |
| 38 | CHEMBL4444610 | Training |
| 38 | CHEMBL4454087 | Training |
| 38 | CHEMBL4475061 | Training |
| 38 | CHEMBL4528723 | Training |
| 38 | CHEMBL4558447 | Training |
| 39 | CHEMBL589256  | Training |
| 39 | CHEMBL591055  | Training |
| 39 | CHEMBL591347  | Training |
| 39 | CHEMBL591348  | Training |
| 39 | CHEMBL591533  | Training |
| 39 | CHEMBL591534  | Training |
| 39 | CHEMBL592234  | Training |
| 39 | CHEMBL592235  | Training |
| 39 | CHEMBL592236  | Training |
| 39 | CHEMBL603612  | Training |
| 39 | CHEMBL606462  | Training |
| 40 | CHEMBL258766  | Training |
| 40 | CHEMBL259973  | Training |
| 40 | CHEMBL260839  | Training |
| 40 | CHEMBL260840  | Training |
| 40 | CHEMBL409215  | Training |
| 41 | CHEMBL1813003 | Training |
| 41 | CHEMBL1813004 | Training |
| 41 | CHEMBL1813005 | Training |
| 41 | CHEMBL1813006 | Training |

|    |               |          |
|----|---------------|----------|
| 41 | CHEMBL1813007 | Training |
| 41 | CHEMBL1813010 | Training |
| 41 | CHEMBL1813011 | Training |
| 42 | CHEMBL469937  | Training |
| 42 | CHEMBL470144  | Training |
| 42 | CHEMBL1956364 | Training |
| 42 | CHEMBL2375947 | Training |
| 42 | CHEMBL2375948 | Training |
| 43 | CHEMBL200840  | Training |
| 43 | CHEMBL383986  | Training |
| 43 | CHEMBL434945  | Training |
| 43 | CHEMBL246203  | Training |
| 43 | CHEMBL246204  | Training |
| 43 | CHEMBL246205  | Training |
| 43 | CHEMBL246206  | Training |
| 43 | CHEMBL246208  | Training |
| 43 | CHEMBL248261  | Training |
| 43 | CHEMBL400309  | Training |
| 44 | CHEMBL187557  | Training |
| 44 | CHEMBL189066  | Training |
| 44 | CHEMBL190938  | Training |
| 44 | CHEMBL188751  | Training |
| 44 | CHEMBL191235  | Training |
| 44 | CHEMBL191276  | Training |
| 44 | CHEMBL364467  | Training |
| 44 | CHEMBL370021  | Training |
| 44 | CHEMBL371195  | Training |
| 44 | CHEMBL426451  | Training |
| 45 | CHEMBL253109  | Training |
| 45 | CHEMBL253310  | Training |
| 45 | CHEMBL253520  | Training |
| 45 | CHEMBL254744  | Training |
| 45 | CHEMBL254946  | Training |
| 45 | CHEMBL402100  | Training |
| 45 | CHEMBL403637  | Training |
| 45 | CHEMBL404467  | Training |
| 45 | CHEMBL427890  | Training |
| 46 | CHEMBL21241   | Training |
| 46 | CHEMBL20392   | Training |
| 46 | CHEMBL20280   | Training |
| 46 | CHEMBL20495   | Training |
| 46 | CHEMBL21105   | Training |
| 46 | CHEMBL21706   | Training |
| 46 | CHEMBL281791  | Training |
| 46 | CHEMBL2088421 | Training |
| 46 | CHEMBL2088422 | Training |
| 47 | CHEMBL3103200 | Training |
| 47 | CHEMBL3103193 | Training |
| 47 | CHEMBL3103197 | Training |
| 47 | CHEMBL3103198 | Training |
| 47 | CHEMBL3103194 | Training |
| 47 | CHEMBL3103195 | Training |
| 47 | CHEMBL3103196 | Training |
| 47 | CHEMBL3103199 | Training |

|    |               |          |
|----|---------------|----------|
| 48 | CHEMBL454651  | Training |
| 48 | CHEMBL455158  | Training |
| 48 | CHEMBL461145  | Training |
| 48 | CHEMBL461533  | Training |
| 48 | CHEMBL509680  | Training |
| 48 | CHEMBL516510  | Training |
| 49 | CHEMBL363006  | Training |
| 50 | CHEMBL201581  | Training |
| 50 | CHEMBL201653  | Training |
| 50 | CHEMBL425766  | Training |
| 50 | CHEMBL202617  | Training |
| 51 | CHEMBL1080470 | Training |
| 51 | CHEMBL1081354 | Training |
| 51 | CHEMBL1081355 | Training |
| 51 | CHEMBL1086861 | Training |
| 52 | CHEMBL4448919 | Training |
| 53 | CHEMBL4062472 | Training |
| 53 | CHEMBL4072395 | Training |
| 53 | CHEMBL4074391 | Training |
| 53 | CHEMBL4093146 | Training |
| 53 | CHEMBL4094877 | Training |
| 53 | CHEMBL4101596 | Training |
| 53 | CHEMBL4103575 | Training |
| 54 | CHEMBL3318038 | Training |
| 54 | CHEMBL3318039 | Training |
| 54 | CHEMBL3318040 | Training |
| 54 | CHEMBL3318041 | Training |
| 54 | CHEMBL518038  | Training |
| 54 | CHEMBL3318037 | Training |
| 54 | CHEMBL456792  | Training |
| 55 | CHEMBL1630380 | Training |
| 55 | CHEMBL1630381 | Training |
| 55 | CHEMBL1630382 | Training |
| 55 | CHEMBL1630383 | Training |
| 55 | CHEMBL1630384 | Training |
| 55 | CHEMBL1630386 | Training |
| 56 | CHEMBL1083110 | Training |
| 56 | CHEMBL1084320 | Training |
| 56 | CHEMBL1084321 | Training |
| 56 | CHEMBL1085062 | Training |
| 56 | CHEMBL1085795 | Training |
| 56 | CHEMBL1085796 | Training |
| 56 | CHEMBL1086515 | Training |
| 57 | CHEMBL116671  | Training |
| 57 | CHEMBL443910  | Training |
| 57 | CHEMBL455853  | Training |
| 57 | CHEMBL476197  | Training |
| 57 | CHEMBL477644  | Training |
| 57 | CHEMBL514568  | Training |
| 57 | CHEMBL515666  | Training |
| 58 | CHEMBL473952  | Training |
| 58 | CHEMBL474149  | Training |
| 58 | CHEMBL474157  | Training |
| 58 | CHEMBL491142  | Training |

|    |               |          |
|----|---------------|----------|
| 58 | CHEMBL514328  | Training |
| 58 | CHEMBL474148  | Training |
| 58 | CHEMBL514007  | Training |
| 59 | CHEMBL481551  | Training |
| 59 | CHEMBL467349  | Training |
| 59 | CHEMBL468160  | Training |
| 59 | CHEMBL512084  | Training |
| 59 | CHEMBL512789  | Training |
| 60 | CHEMBL461571  | Training |
| 60 | CHEMBL549746  | Training |
| 60 | CHEMBL552240  | Training |
| 60 | CHEMBL560830  | Training |
| 60 | CHEMBL562864  | Training |
| 60 | CHEMBL564036  | Training |
| 60 | CHEMBL564902  | Training |
| 61 | CHEMBL239352  | Training |
| 61 | CHEMBL239353  | Training |
| 61 | CHEMBL239561  | Training |
| 61 | CHEMBL240437  | Training |
| 61 | CHEMBL240459  | Training |
| 61 | CHEMBL392474  | Training |
| 61 | CHEMBL430182  | Training |
| 62 | CHEMBL375370  | Training |
| 63 | CHEMBL119911  | Training |
| 64 | CHEMBL4445084 | Training |
| 64 | CHEMBL4466709 | Training |
| 64 | CHEMBL4471421 | Training |
| 64 | CHEMBL4474407 | Training |
| 64 | CHEMBL4571498 | Training |
| 64 | CHEMBL4586557 | Training |
| 65 | CHEMBL3923046 | Training |
| 65 | CHEMBL3945367 | Training |
| 65 | CHEMBL3948805 | Training |
| 65 | CHEMBL3957467 | Training |
| 65 | CHEMBL3962832 | Training |
| 65 | CHEMBL4110590 | Training |
| 66 | CHEMBL3398446 | Training |
| 66 | CHEMBL3398449 | Training |
| 66 | CHEMBL3398451 | Training |
| 67 | CHEMBL2206302 | Training |
| 67 | CHEMBL2206303 | Training |
| 67 | CHEMBL2206304 | Training |
| 68 | CHEMBL1927473 | Training |
| 68 | CHEMBL2035057 | Training |
| 68 | CHEMBL2035068 | Training |
| 68 | CHEMBL2035069 | Training |
| 68 | CHEMBL2035070 | Training |
| 68 | CHEMBL2035071 | Training |
| 69 | CHEMBL1087471 | Training |
| 69 | CHEMBL1087590 | Training |
| 69 | CHEMBL1087593 | Training |
| 69 | CHEMBL1087594 | Training |
| 70 | CHEMBL20125   | Training |
| 70 | CHEMBL279211  | Training |

|    |               |          |
|----|---------------|----------|
| 70 | CHEMBL281608  | Training |
| 71 | CHEMBL230519  | Training |
| 72 | CHEMBL278590  | Training |
| 72 | CHEMBL248906  | Training |
| 72 | CHEMBL124842  | Training |
| 72 | CHEMBL125230  | Training |
| 72 | CHEMBL340011  | Training |
| 72 | CHEMBL435278  | Training |
| 73 | CHEMBL87928   | Training |
| 73 | CHEMBL89996   | Training |
| 74 | CHEMBL110743  | Training |
| 74 | CHEMBL111271  | Training |
| 75 | CHEMBL220597  | Training |
| 75 | CHEMBL221850  | Training |
| 75 | CHEMBL222117  | Training |
| 75 | CHEMBL374296  | Training |
| 76 | CHEMBL220708  | Training |
| 77 | CHEMBL237519  | Training |
| 77 | CHEMBL237307  | Training |
| 77 | CHEMBL236876  | Training |
| 77 | CHEMBL237085  | Training |
| 77 | CHEMBL237518  | Training |
| 77 | CHEMBL392717  | Training |
| 78 | CHEMBL206794  | Training |
| 78 | CHEMBL203940  | Training |
| 78 | CHEMBL205725  | Training |
| 78 | CHEMBL377508  | Training |
| 78 | CHEMBL380837  | Training |
| 79 | CHEMBL107367  | Training |
| 79 | CHEMBL147384  | Training |
| 79 | CHEMBL356382  | Training |
| 79 | CHEMBL2282523 | Training |
| 79 | CHEMBL474295  | Training |
| 79 | CHEMBL147095  | Training |
| 80 | CHEMBL589747  | Training |
| 81 | CHEMBL481683  | Training |
| 81 | CHEMBL482334  | Training |
| 82 | CHEMBL331469  | Training |
| 83 | CHEMBL200495  | Training |
| 83 | CHEMBL118887  | Training |
| 83 | CHEMBL121206  | Training |
| 84 | CHEMBL381477  | Training |
| 85 | CHEMBL477095  | Training |
| 85 | CHEMBL478725  | Training |
| 85 | CHEMBL593796  | Training |
| 85 | CHEMBL593801  | Training |
| 85 | CHEMBL594034  | Training |
| 86 | CHEMBL118756  | Training |
| 86 | CHEMBL118251  | Training |
| 86 | CHEMBL122417  | Training |
| 86 | CHEMBL2037184 | Training |
| 87 | CHEMBL4449760 | Training |
| 87 | CHEMBL4453610 | Training |
| 87 | CHEMBL4461949 | Training |

|     |               |          |
|-----|---------------|----------|
| 87  | CHEMBL4471853 | Training |
| 88  | CHEMBL4073499 | Training |
| 88  | CHEMBL4092600 | Training |
| 88  | CHEMBL4064900 | Training |
| 88  | CHEMBL4100336 | Training |
| 89  | CHEMBL3906547 | Training |
| 89  | CHEMBL3916538 | Training |
| 89  | CHEMBL3919950 | Training |
| 89  | CHEMBL3982893 | Training |
| 90  | CHEMBL1934471 | Training |
| 90  | CHEMBL1934473 | Training |
| 91  | CHEMBL1934314 | Training |
| 92  | CHEMBL472071  | Training |
| 92  | CHEMBL485155  | Training |
| 92  | CHEMBL485179  | Training |
| 92  | CHEMBL520508  | Training |
| 93  | CHEMBL468159  | Training |
| 94  | CHEMBL233003  | Training |
| 94  | CHEMBL234819  | Training |
| 94  | CHEMBL393381  | Training |
| 94  | CHEMBL394031  | Training |
| 95  | CHEMBL446893  | Training |
| 95  | CHEMBL147721  | Training |
| 95  | CHEMBL345009  | Training |
| 96  | CHEMBL86658   | Training |
| 96  | CHEMBL355695  | Training |
| 96  | CHEMBL166637  | Training |
| 96  | CHEMBL166628  | Training |
| 97  | CHEMBL117796  | Training |
| 97  | CHEMBL118577  | Training |
| 97  | CHEMBL118816  | Training |
| 97  | CHEMBL324027  | Training |
| 98  | CHEMBL491750  | Training |
| 98  | CHEMBL491751  | Training |
| 99  | CHEMBL25710   | Training |
| 99  | CHEMBL23874   | Training |
| 99  | CHEMBL1783033 | Training |
| 100 | CHEMBL4519542 | Training |
| 100 | CHEMBL4535730 | Training |
| 100 | CHEMBL4593987 | Training |
| 101 | CHEMBL4464538 | Training |
| 101 | CHEMBL4519376 | Training |
| 102 | CHEMBL4436335 | Training |
| 102 | CHEMBL4470753 | Training |
| 102 | CHEMBL4516239 | Training |
| 103 | CHEMBL4454999 | Training |
| 103 | CHEMBL4457812 | Training |
| 103 | CHEMBL4543257 | Training |
| 104 | CHEMBL4160945 | Training |
| 104 | CHEMBL4167789 | Training |
| 104 | CHEMBL4174996 | Training |
| 105 | CHEMBL4060007 | Training |
| 106 | CHEMBL1828826 | Training |
| 106 | CHEMBL3752643 | Training |

|     |               |          |
|-----|---------------|----------|
| 106 | CHEMBL3753965 | Training |
| 107 | CHEMBL3601087 | Training |
| 107 | CHEMBL3601089 | Training |
| 107 | CHEMBL3601093 | Training |
| 108 | CHEMBL2022403 | Training |
| 108 | CHEMBL2022404 | Training |
| 108 | CHEMBL2022405 | Training |
| 109 | CHEMBL1935493 | Training |
| 109 | CHEMBL1935495 | Training |
| 109 | CHEMBL1935608 | Training |
| 110 | CHEMBL1927474 | Training |
| 110 | CHEMBL1927475 | Training |
| 111 | CHEMBL1075895 | Training |
| 111 | CHEMBL1080365 | Training |
| 111 | CHEMBL1080699 | Training |
| 112 | CHEMBL562786  | Training |
| 113 | CHEMBL489178  | Training |
| 113 | CHEMBL514544  | Training |
| 113 | CHEMBL522754  | Training |
| 114 | CHEMBL481549  | Training |
| 114 | CHEMBL481550  | Training |
| 114 | CHEMBL520272  | Training |
| 115 | CHEMBL101123  | Training |
| 115 | CHEMBL322690  | Training |
| 115 | CHEMBL443218  | Training |
| 116 | CHEMBL197684  | Training |
| 116 | CHEMBL198163  | Training |
| 116 | CHEMBL383607  | Training |
| 117 | CHEMBL117402  | Training |
| 117 | CHEMBL325844  | Training |
| 117 | CHEMBL331388  | Training |
| 119 | CHEMBL252675  | Training |
| 119 | CHEMBL253486  | Training |
| 119 | CHEMBL253923  | Training |
| 120 | CHEMBL118329  | Training |
| 120 | CHEMBL120243  | Training |
| 121 | CHEMBL1090212 | Training |
| 121 | CHEMBL1091664 | Training |
| 122 | CHEMBL401534  | Training |
| 122 | CHEMBL256142  | Training |
| 122 | CHEMBL256358  | Training |
| 123 | CHEMBL364378  | Training |
| 123 | CHEMBL192521  | Training |
| 123 | CHEMBL193082  | Training |
| 124 | CHEMBL427530  | Training |
| 124 | CHEMBL191149  | Training |
| 124 | CHEMBL191556  | Training |
| 126 | CHEMBL232395  | Training |
| 126 | CHEMBL391479  | Training |
| 126 | CHEMBL232396  | Training |
| 129 | CHEMBL3899254 | Training |
| 129 | CHEMBL3890301 | Training |
| 130 | CHEMBL3601098 | Training |
| 130 | CHEMBL3601099 | Training |



|     |               |          |
|-----|---------------|----------|
| 131 | CHEMBL3335660 | Training |
| 131 | CHEMBL3335661 | Training |
| 133 | CHEMBL1778839 | Training |
| 133 | CHEMBL1778840 | Training |
| 134 | CHEMBL1711502 | Training |
| 134 | CHEMBL1732818 | Training |
| 135 | CHEMBL1644305 | Training |
| 135 | CHEMBL1644310 | Training |
| 136 | CHEMBL1644299 | Training |
| 136 | CHEMBL1644301 | Training |
| 137 | CHEMBL1079961 | Training |
| 137 | CHEMBL1079962 | Training |
| 138 | CHEMBL1075723 | Training |
| 138 | CHEMBL1075732 | Training |
| 139 | CHEMBL456912  | Training |
| 139 | CHEMBL514713  | Training |
| 140 | CHEMBL489768  | Training |
| 140 | CHEMBL489769  | Training |
| 141 | CHEMBL448996  | Training |
| 141 | CHEMBL450050  | Training |
| 142 | CHEMBL401560  | Training |
| 142 | CHEMBL403909  | Training |
| 143 | CHEMBL102004  | Training |
| 143 | CHEMBL317424  | Training |
| 146 | CHEMBL246209  | Training |
| 146 | CHEMBL248411  | Training |
| 147 | CHEMBL240868  | Training |
| 147 | CHEMBL241269  | Training |
| 148 | CHEMBL2113263 | Training |
| 148 | CHEMBL220223  | Training |
| 149 | CHEMBL214289  | Training |
| 149 | CHEMBL214295  | Training |
| 151 | CHEMBL495904  | Training |
| 151 | CHEMBL498171  | Training |
| 152 | CHEMBL234659  | Training |
| 152 | CHEMBL391478  | Training |
| 153 | CHEMBL234588  | Training |
| 153 | CHEMBL234589  | Training |
| 154 | CHEMBL255309  | Training |
| 154 | CHEMBL403432  | Training |

**Supplementary Table 3.** SBVS performance of target-specific ML SFs trained on the users' own data sets ACHE and HMGR and tested on the corresponding DEKOIS 2.0 benchmarks (PETS option, see Table S1 for the performance of four generic SFs). The values indicated here are median values obtained after 10 training-test runs of each ML algorithm on each training-test partition. Detailed results for each run can be downloaded from <https://github.com/vktrannguyen/MLSF-protocol> (Supporting Information folder).

|             | ACHE         | HMGR         |
|-------------|--------------|--------------|
| <b>RF:</b>  |              |              |
| - EF1%      | 30.00        | 30.00        |
| - NEF1%     | <b>1.000</b> | <b>1.000</b> |
| <b>XGB:</b> |              |              |
| - EF1%      | 10.00        | 30.00        |
| - NEF1%     | <b>0.333</b> | <b>1.000</b> |
| <b>SVM:</b> |              |              |
| - EF1%      | 30.00        | 30.00        |
| - NEF1%     | <b>1.000</b> | <b>1.000</b> |
| <b>ANN:</b> |              |              |
| - EF1%      | 5.00         | 30.00        |
| - NEF1%     | <b>0.167</b> | <b>1.000</b> |
| <b>DNN:</b> |              |              |
| - EF1%      | 7.50         | 30.00        |
| - NEF1%     | <b>0.250</b> | <b>1.000</b> |

**Supplementary Table 4.** SBVS performance of target-specific ML SFs trained on the users' own training sets ACHE, HMGR, PPARA and tested on the corresponding users' own test sets (OTS option). The values related to target-specific ML SFs are the medians obtained after 10 training-test runs of each ML algorithm on each training-test partition. Detailed results for each run can be downloaded from <https://github.com/vktrannguyen/MLSF-protocol> (Supporting Information folder). The performance of four generic SFs (Smina, IFP, CNN-Score, RF-Score-VS) is also reported for comparison (only one run is performed on each test set for each of these SFs).

|                              | ACHE         | HMGR         | PPARA        |
|------------------------------|--------------|--------------|--------------|
| - Number of actives          | 37           | 31           | 80           |
| - Number of inactives/decoys | 2170         | 2077         | 2399         |
| - Total number of molecules  | 2207         | 2108         | 2479         |
| - Maximal EF1%               | 59.46        | 67.74        | 30.00        |
| <b>RF:</b>                   |              |              |              |
| - EF1%                       | 43.24        | 54.84        | 0.00         |
| - <b>NEF1%</b>               | <b>0.727</b> | <b>0.810</b> | <b>0.000</b> |
| <b>XGB:</b>                  |              |              |              |
| - EF1%                       | 45.95        | 51.61        | 1.25         |
| - <b>NEF1%</b>               | <b>0.773</b> | <b>0.762</b> | <b>0.042</b> |
| <b>SVM:</b>                  |              |              |              |
| - EF1%                       | 40.54        | 54.84        | 1.88         |
| - <b>NEF1%</b>               | <b>0.682</b> | <b>0.810</b> | <b>0.063</b> |
| <b>ANN:</b>                  |              |              |              |
| - EF1%                       | 37.84        | 58.06        | 2.50         |
| - <b>NEF1%</b>               | <b>0.636</b> | <b>0.857</b> | <b>0.083</b> |
| <b>DNN:</b>                  |              |              |              |
| - EF1%                       | 35.14        | 54.84        | 30.00        |
| - <b>NEF1%</b>               | <b>0.591</b> | <b>0.810</b> | <b>1.000</b> |
| <b>Smina:</b>                |              |              |              |
| - EF1%                       | 8.11         | 3.23         | 1.25         |
| - <b>NEF1%</b>               | <b>0.136</b> | <b>0.048</b> | <b>0.042</b> |
| <b>IFP:</b>                  |              |              |              |
| - EF1%                       | 0.00         | 16.13        | 0.00         |
| - <b>NEF1%</b>               | <b>0.000</b> | <b>0.238</b> | <b>0.000</b> |
| <b>CNN-Score:</b>            |              |              |              |
| - EF1%                       | 8.11         | 0.00         | 0.00         |
| - <b>NEF1%</b>               | <b>0.136</b> | <b>0.000</b> | <b>0.000</b> |
| <b>RF-Score-VS:</b>          |              |              |              |
| - EF1%                       | 5.41         | 9.68         | 1.25         |
| - <b>NEF1%</b>               | <b>0.091</b> | <b>0.143</b> | <b>0.042</b> |

**Supplementary Table 5.** SBVS performance of target-specific ML SFs issued from the five “Dissimilar” (D) training-test partitions. A “Dissimilar” partition includes a full training set for a target, and a part of its corresponding test set composed only of molecules whose similarity (Morgan fingerprints, 2048 bits, radius 2) to any training molecule is lower than 0.70. The values related to target-specific ML SFs are the medians obtained after 10 training-test runs of each ML algorithm on each training-test partition. The performance of four generic SFs (Smina, IFP, CNN-Score, RF-Score-VS) is also reported for comparison (only one run is performed on each test set for each of these SFs).

|                              | <b>ACHE-PETS-D</b> | <b>ACHE-OTS-D</b> | <b>HMGR-PETS-D</b> | <b>HMGR-OTS-D</b> | <b>PPARA-OTS-D</b> |
|------------------------------|--------------------|-------------------|--------------------|-------------------|--------------------|
| - Number of actives          | 39                 | 12                | 8                  | 7                 | 65                 |
| - Number of inactives/decoys | 1200               | 2136              | 1199               | 2026              | 1698               |
| - Total number of molecules  | 1239               | 2148              | 1207               | 2033              | 1763               |
| - Maximal EF1%               | 30.77              | 100.00            | 100.00             | 100.00            | 26.15              |
| <b>RF:</b>                   |                    |                   |                    |                   |                    |
| - EF1%                       | 30.77              | 41.67             | 87.50              | 71.43             | 1.54               |
| - <b>NEF1%</b>               | <b>1.000</b>       | <b>0.417</b>      | <b>0.875</b>       | <b>0.714</b>      | <b>0.059</b>       |
| <b>XGB:</b>                  |                    |                   |                    |                   |                    |
| - EF1%                       | 7.69               | 41.67             | 62.50              | 71.43             | 0.00               |
| - <b>NEF1%</b>               | <b>0.250</b>       | <b>0.417</b>      | <b>0.625</b>       | <b>0.714</b>      | <b>0.000</b>       |
| <b>SVM:</b>                  |                    |                   |                    |                   |                    |
| - EF1%                       | 30.77              | 41.67             | 87.50              | 71.43             | 1.54               |
| - <b>NEF1%</b>               | <b>1.000</b>       | <b>0.417</b>      | <b>0.875</b>       | <b>0.714</b>      | <b>0.059</b>       |
| <b>ANN:</b>                  |                    |                   |                    |                   |                    |
| - EF1%                       | 5.13               | 33.33             | 100.00             | 71.43             | 3.08               |
| - <b>NEF1%</b>               | <b>0.167</b>       | <b>0.333</b>      | <b>1.000</b>       | <b>0.714</b>      | <b>0.118</b>       |
| <b>DNN:</b>                  |                    |                   |                    |                   |                    |
| - EF1%                       | 5.13               | 33.33             | 68.75              | 71.43             | 26.15              |
| - <b>NEF1%</b>               | <b>0.167</b>       | <b>0.333</b>      | <b>0.688</b>       | <b>0.714</b>      | <b>1.000</b>       |
| <b>Smina:</b>                |                    |                   |                    |                   |                    |
| - EF1%                       | 15.38              | 16.67             | 0.00               | 0.00              | 1.54               |
| - <b>NEF1%</b>               | <b>0.500</b>       | <b>0.167</b>      | <b>0.000</b>       | <b>0.000</b>      | <b>0.059</b>       |
| <b>IFP:</b>                  |                    |                   |                    |                   |                    |
| - EF1%                       | 15.38              | 0.00              | 37.50              | 14.29             | 1.54               |
| - <b>NEF1%</b>               | <b>0.500</b>       | <b>0.000</b>      | <b>0.375</b>       | <b>0.143</b>      | <b>0.059</b>       |
| <b>CNN-Score:</b>            |                    |                   |                    |                   |                    |
| - EF1%                       | 0.00               | 16.67             | 25.00              | 0.00              | 0.00               |
| - <b>NEF1%</b>               | <b>0.000</b>       | <b>0.167</b>      | <b>0.250</b>       | <b>0.000</b>      | <b>0.000</b>       |
| <b>RF-Score-VS:</b>          |                    |                   |                    |                   |                    |
| - EF1%                       | 2.56               | 0.00              | 62.50              | 28.57             | 0.00               |
| - <b>NEF1%</b>               | <b>0.083</b>       | <b>0.000</b>      | <b>0.625</b>       | <b>0.286</b>      | <b>0.000</b>       |

**Supplementary Discussion.** Comparing the ligand binding sites of the ACHE human-extracted and *Tetronarce californica*-extracted variants.

The UniProt ID of the ACHE human-extracted variant is P22303 (representative PDB ID: 4M0E).

The UniProt ID of the ACHE *Tetronarce californica*-extracted variant is P04058 (representative PDB ID: 1E66).

The binding site of each PDB structure is composed of all amino acid residues that contain at least one heavy atom found within 5 Å from any heavy atom of the co-crystallized ligand.

The “Align” tool of UniProt is used to align the two amino acid sequences that correspond to the two binding sites of P22303 and P04058. The aligned sequences are as follows (the different amino acids are marked in bold red):

| <b>P22303 (4M0E)</b> | <b>P04058 (1E66)</b> |
|----------------------|----------------------|
| D74                  | D72                  |
| G82                  | G80                  |
| <b>T83</b>           | <b>S81</b>           |
| W86                  | W84                  |
| G120                 | G117                 |
| G121                 | G118                 |
| G122                 | G119                 |
| Y124                 | Y121                 |
| S125                 | S122                 |
| Y133                 | Y130                 |
| E202                 | E199                 |
| S203                 | S200                 |
| F297                 | F290                 |
| <b>Y337</b>          | <b>F330</b>          |
| F338                 | F331                 |
| Y341                 | Y334                 |
| W439                 | W432                 |
| M443                 | M436                 |
| <b>P446</b>          | <b>I439</b>          |
| H447                 | H440                 |
| G448                 | G441                 |
| Y449                 | Y442                 |

There are 19 (out of 22) similar positions after sequence alignment. The percentage sequence identity for the binding sites is therefore 86.36%.
